---

# Nucleic Acids Research

---

## Contents

Volume 35 Database issue, January 1, 2007

---

|                                                                                                                                      |                                                                                                                                                                                                                                                                                                                                                                                  |         |
|--------------------------------------------------------------------------------------------------------------------------------------|----------------------------------------------------------------------------------------------------------------------------------------------------------------------------------------------------------------------------------------------------------------------------------------------------------------------------------------------------------------------------------|---------|
| <b>Editorial</b>                                                                                                                     | A.Batemen                                                                                                                                                                                                                                                                                                                                                                        | D1      |
| <b>The Molecular Biology Database Collection: 2007 update</b>                                                                        | M.Y.Galperin                                                                                                                                                                                                                                                                                                                                                                     | D3–D4   |
| <b>Database resources of the National Center for Biotechnology Information</b>                                                       | D.L.Wheeler, T.Barrett, D.A.Benson, S.H.Bryant, K.Canese, V.Chetvermin, D.M.Church, M.DiCuccio, R.Edgar, S.Federhen, L.Y.Geer, Y.Kapustin, O.Khovayko, D.Landsman, D.J.Lipman, T.L.Madden, D.R.Maglott, J.Ostell, V.Miller, K.D.Pruitt, G.D.Schuler, E.Sequeira, S.T.Sherry, K.Sirotkin, A.Souvorov, G.Starchenko, R.L.Tatusov, T.A.Tatusova, L.Wagner and E.Yaschenko           | D5–D12  |
| <b>DDBJ working on evaluation and classification of bacterial genes in INSDC</b>                                                     | H.Sugawara, T.Abe, T.Gojobori and Y.Tateno                                                                                                                                                                                                                                                                                                                                       | D13–D15 |
| <b>EMBL Nucleotide Sequence Database in 2006</b>                                                                                     | T.Kulikova, R.Akhtar, P.Aldebert, N.Althorpe, M.Andersson, A.Baldwin, K.Bates, S.Bhattacharyya, L.Bower, P.Browne, M.Castro, G.Cochrane, K.Duggan, R.Eberhardt, N.Faruque, G.Hoad, C.Kanz, C.Lee, R.Leinonen, Q.Lin, V.Lombard, R.Lopez, D.Lorenc, H.McWilliam, G.Mukherjee, F.Nardone, M.P.G.Pastor, S.Plaister, S.Sobhany, Peter Stoehr, R.Vaughan, D.Wu, W.Zhu and R.Apweiler | D16–D20 |
| <b>GenBank</b>                                                                                                                       | D.A.Benson, I.K.-Mizrachi, D.J.Lipman, J.Ostell and D.L.Wheeler                                                                                                                                                                                                                                                                                                                  | D21–D25 |
| <b>Entrez Gene: gene-centered information at NCBI</b>                                                                                | D.Maglott, J.Ostell, K.D.Pruitt and T.Tatusova                                                                                                                                                                                                                                                                                                                                   | D26–D31 |
| <b>Developments in CORG: a gene-centric comparative genomics resource</b>                                                            | C.Dieterich, M.W.Franz and M.Vingron                                                                                                                                                                                                                                                                                                                                             | D32–D35 |
| <b>InSatDb: a microsatellite database of fully sequenced insect genomes</b>                                                          | S.Archak, E.Meduri, P.S.Kumar and J.Nagaraju                                                                                                                                                                                                                                                                                                                                     | D36–D39 |
| <b>s OriDB: a DNA replication origin database</b>                                                                                    | C.A.Nieduszynski, S.-i.Hiraga, P.Ak, C.J.Benham and A.D.Donaldson                                                                                                                                                                                                                                                                                                                | D40–D46 |
| <b>Patome: a database server for biological sequence annotation and analysis in issued patents and published patent applications</b> | B.Lee, T.Kim, S.-K.Kim, K.H.Lee and D.Lee                                                                                                                                                                                                                                                                                                                                        | D47–D50 |
| <b>PolymiRTS Database: linking polymorphisms in microRNA target sites with complex traits</b>                                        | L.Bao, M.Zhou, L.Wu, L.Lu, D.Goldowitz, R.W.Williams and Y.Cui                                                                                                                                                                                                                                                                                                                   | D51–D54 |
| <b>s Pseudogene.org: a comprehensive database and comparison platform for pseudogene annotation</b>                                  | J.E.Karro, Y.Yan, D.Zheng, Z.Zhang, N.Carriero, P.Cayting, P.Harrison and M.Gerstein                                                                                                                                                                                                                                                                                             | D55–D60 |
| <b>s NCBI reference sequences (RefSeq): a curated non-redundant sequence database of genomes, transcripts and proteins</b>           | K.D.Pruitt, T.Tatusova and D.R.Maglott                                                                                                                                                                                                                                                                                                                                           | D61–D65 |
| <b>RetrOryza: a database of the rice LTR-retrotransposons</b>                                                                        | C.Chaparro, R.Guyot, A.Zuccolo, B.Piégu and O.Panaud                                                                                                                                                                                                                                                                                                                             | D66–D70 |
| <b>SNPSTR: a database of compound microsatellite-SNP markers</b>                                                                     | I.Agrafioti, and M.P.H.Stumpf                                                                                                                                                                                                                                                                                                                                                    | D71–D75 |

*Continued*

|          |                                                                                                                                                                                                                        |                                                                                                                                    |           |
|----------|------------------------------------------------------------------------------------------------------------------------------------------------------------------------------------------------------------------------|------------------------------------------------------------------------------------------------------------------------------------|-----------|
|          | <b>SGDB: a database of synthetic genes re-designed for optimizing protein over-expression</b>                                                                                                                          | G.Wu, Y.Zheng, I.Qureshi, H.T.Zin, T.Beck, B.Bulka and S.J.Freeland                                                                | D76–D79   |
| <b>s</b> | <b>TRDB—The Tandem Repeats Database</b>                                                                                                                                                                                | Y.Gelfand, A.Rodriguez and G.Benson                                                                                                | D80–D87   |
|          | <b>VISTA Enhancer Browser—a database of tissue-specific human enhancers</b>                                                                                                                                            | A.Visel, S.Minovitsky, I.Dubchak, and L.A.Pennacchio                                                                               | D88–D92   |
|          | <b>The ASAP II database: analysis and comparative genomics of alternative splicing in 15 animal species</b>                                                                                                            | N.Kim, A.V.Alekseyenko, M.Roy and C.Lee                                                                                            | D93–D98   |
|          | <b>ECgene: an alternative splicing database update</b>                                                                                                                                                                 | Y.Lee, Y.Lee, B.Kim, Y.Shin, S.Nam, P.Kim, N.Kim, W.-H.Chung, J.Kim and S.Lee                                                      | D99–D103  |
|          | <b>H-DBAS: Alternative splicing database of completely sequenced and manually annotated full-length cDNAs based on H-Invitational</b>                                                                                  | J.-i.Takeda, Y.Suzuki, M.Nakao, T.Kuroda, S.Sugano, T.Gojobori and T.Imanishi                                                      | D104–D109 |
|          | <b>U12DB: a database of orthologous U12-type spliceosomal introns</b>                                                                                                                                                  | T.S.Alioto                                                                                                                         | D110–D115 |
| <b>s</b> | <b>GenomeTrafac: a whole genome resource for the detection of transcription factor binding site clusters associated with conventional and microRNA encoding genes conserved between mouse and human gene orthologs</b> | A.G.Jegga, J.Chen, S.Gowrisankar, M.A.Deshmukh, R.Gudivada, S.Kong, V.Kaimal and B.J.Aronow                                        | D116–D121 |
|          | <b>PRemod: a database of genome-wide mammalian cis-regulatory module predictions</b>                                                                                                                                   | V.Ferretti, C.Poitras, D.Bergeron, B.Coulombe, F.Robert and M.Blanchette                                                           | D122–D126 |
|          | <b>SwissRegulon: a database of genome-wide annotations of regulatory sites</b>                                                                                                                                         | M.Pachkov, I.Erb, N.Molina and E.v.Nimwegen                                                                                        | D127–D131 |
| <b>s</b> | <b>Tractor_DB (version 2.0): a database of regulatory interactions in gamma-proteobacterial genomes</b>                                                                                                                | A.G.Pérez, V.E.Angarica, A.T.R.Vasconcelos and J.Collado-Vides                                                                     | D132–D136 |
|          | <b>TRED: a transcriptional regulatory element database, new entries and other development</b>                                                                                                                          | C.Jiang, Z.Xuan, F.Zhao and M.Q.Zhang                                                                                              | D137–D140 |
| <b>s</b> | <b>dbRES: a web-oriented database for annotated RNA editing sites</b>                                                                                                                                                  | T.He, P.Du and Y.Li                                                                                                                | D141–D144 |
|          | <b>fRNAdb: a platform for mining/annotating functional RNA candidates from non-coding RNA sequences</b>                                                                                                                | T.Kin, K.Yamada, G.Terai, H.Okida, Y.Yoshinari, Y.Ono, A.Kojima, Y.Kimura, T.Komori and K.Asai                                     | D145–D148 |
|          | <b>miRGen: a database for the study of animal microRNA genomic organization and function</b>                                                                                                                           | M.Megraw, P.Sethupathy, B.Corda and A.G.Hatzigeorgiou                                                                              | D149–D155 |
|          | <b>NATsDB: Natural Antisense Transcripts DataBase</b>                                                                                                                                                                  | Y.Zhang, J.Li, L.Kong, G.Gao, Q.-R.Liu and L.Wei                                                                                   | D156–D161 |
|          | <b>Noncoding RNAs database (ncRNAdb)</b>                                                                                                                                                                               | M.Szymanski, V.A.Erdmann and J.Barciszewski                                                                                        | D162–D164 |
| <b>s</b> | <b>PolyA_DB 2: mRNA polyadenylation sites in vertebrate genes</b>                                                                                                                                                      | J.Y.Lee, I.Yeh, J.Y.Park and B.Tian                                                                                                | D165–D168 |
|          | <b>The ribosomal database project (RDP-II): introducing <i>myRDP</i> space and quality controlled public data</b>                                                                                                      | J.R.Cole, B.Chai, R.J. Farris, Q.Wang, A.S.Kulam-Syed-Mohideen, D.M.McGarrell, A.M.Bandela, E.Cardenas, G.M.Garrity and J.M.Tiedje | D169–D172 |
|          | <b>REDIdb: the RNA editing database</b>                                                                                                                                                                                | E.Picardi, T.M.R.Regina, A.Brennicke, and C.Quagliariello                                                                          | D173–D177 |
| <b>s</b> | <b>RNAdb 2.0—an expanded database of mammalian non-coding RNAs</b>                                                                                                                                                     | K.C.Pang, S.Stephen, M.E.Dinger, P.G.Engström, B.Lenhard and J.S.Mattick                                                           | D178–D182 |
|          | <b>Sno/scaRNAbase: a curated database for small nucleolar RNAs and cajal body-specific RNAs</b>                                                                                                                        | J.Xie, M.Zhang, T.Zhou, X.Hua, L.Tang and W.Wu                                                                                     | D183–D187 |
|          | <b>TassDB: a database of alternative tandem splice sites</b>                                                                                                                                                           | M.Hiller, S.Nikolajewa, K.Huse, K.Szafranski, P.Rosenstiel, S.Schuster, R.Backofen and M.Platzer                                   | D188–D192 |
|          | <b>The Universal Protein Resource (UniProt)</b>                                                                                                                                                                        | The UniProt Consortium                                                                                                             | D193–D197 |

*Continued*

|          |                                                                                                                                              |                                                                                                                                                                                                                                                                                                                                                                                                                                                                                                                             |           |
|----------|----------------------------------------------------------------------------------------------------------------------------------------------|-----------------------------------------------------------------------------------------------------------------------------------------------------------------------------------------------------------------------------------------------------------------------------------------------------------------------------------------------------------------------------------------------------------------------------------------------------------------------------------------------------------------------------|-----------|
|          | <b>BindingDB: a web-accessible database of experimentally determined protein–ligand binding affinities</b>                                   | T.Liu, Y.Lin, X.Wen, R.N.Jorissen and M.K.Gilson                                                                                                                                                                                                                                                                                                                                                                                                                                                                            | D198–D201 |
|          | <b>PIDD: database for Protein Inter-atomic Distance Distributions</b>                                                                        | D.Wu, F.Cui, R.Jernigan and Z.Wu                                                                                                                                                                                                                                                                                                                                                                                                                                                                                            | D202–D207 |
| <b>s</b> | <b>eSLDB: eukaryotic subcellular localization database</b>                                                                                   | A.Pierleoni, P.L.Martelli, P.Fariselli and R.Casadio                                                                                                                                                                                                                                                                                                                                                                                                                                                                        | D208–D212 |
| <b>s</b> | <b>SUBA: the Arabidopsis Subcellular Database</b>                                                                                            | J.L.Heazlewood, R.E.Verboom, J.Tonti-Filippini, I.Small and A.H.Millar                                                                                                                                                                                                                                                                                                                                                                                                                                                      | D213–D218 |
|          | <b>FireDB—a database of functionally important residues from proteins of known structure</b>                                                 | G.Lopez, A.Valencia and M.Tress                                                                                                                                                                                                                                                                                                                                                                                                                                                                                             | D219–D223 |
|          | <b>New developments in the InterPro database</b>                                                                                             | N.J.Mulder, R.Apweiler, T.K.Attwood, A.Bairoch, A.Bateman, D.Binns, P.Bork, V.Buillard, L.Cerutti, R.Copley, E.Courcelle, U.Das, L.Daugherty, M.Dibley, R.Finn, W.Fleischmann, J.Gough, D.Haft, N.Hulo, S.Hunter, D.Kahn, A.Kanapin, A.Kejariwal, A.Labarga, P.S.Langendijk-Genevaux, D.Lonsdale, R.Lopez, I.Letunic, M.Madera, J.Maslen, C.McAnulla, J.McDowall, J.Mistry, A.Mitchell, A.N.Nikolskaya, S.Orchard, C.Orengo, R.Petryszak, J.D.Selengut, C.J.A.Sigrist, P.D.Thomas, F.Valentin, D.Wilson, C.H.Wu and C.Yeats | D224–D228 |
|          | <b>Phospho3D: a database of three-dimensional structures of protein phosphorylation sites</b>                                                | A.Zanzoni, G.Ausiello, A.Via, P.F.Gherardini, and M.Helmer-Citterich                                                                                                                                                                                                                                                                                                                                                                                                                                                        | D229–D231 |
|          | <b>A Protein Classification Benchmark collection for machine learning</b>                                                                    | P.Sonogo, M.Pacurar, S.Dhir, A.Kertész-Farkas, A.Kocsor, Z.Gáspári, J.A.M.Leunissen and S.Pongor                                                                                                                                                                                                                                                                                                                                                                                                                            | D232–D236 |
|          | <b>CDD: a conserved domain database for interactive domain family analysis</b>                                                               | A.Marchler-Bauer, J.B.Anderson, M.K.Derbyshire, C.DeWeese-Scott, N.R.Gonzales, M.Gwadz, L.Hao, S.He, D.I.Hurwitz, J.D.Jackson, Z.Ke, D.Krylov, C.J.Lanczycki, C.A.Liebert, C.Liu, F.Lu, S.Lu, G.H.Marchler, M.Mullokandov, J.S.Song, N.Thanki, R.A.Yamashita, J.J.Yin, D.Zhang and S.H.Bryant                                                                                                                                                                                                                               | D237–D240 |
|          | <b>EVEREST: a collection of evolutionary conserved protein domains</b>                                                                       | E.Portugaly, N.Linial and M.Linial                                                                                                                                                                                                                                                                                                                                                                                                                                                                                          | D241–D246 |
|          | <b>PANTHER version 6: protein sequence and function evolution data with expanded representation of biological pathways</b>                   | H.Mi, N.Guo, A.Kejariwal and P.D.Thomas                                                                                                                                                                                                                                                                                                                                                                                                                                                                                     | D247–D252 |
| <b>s</b> | <b>SISYPHUS—structural alignments for proteins with non-trivial relationships</b>                                                            | A.Andreeva, A.Prlić, T.J.P.Hubbard and A.G.Murzin                                                                                                                                                                                                                                                                                                                                                                                                                                                                           | D253–D259 |
|          | <b>TIGRFAMs and Genome Properties: tools for the assignment of molecular function and biological process in prokaryotic genomes</b>          | J.D.Selengut, D.H.Haft, T.Davidsen, A.Ganapathy, M.Gwinn-Giglio, W.C.Nelson, A.R.Richter and O.White                                                                                                                                                                                                                                                                                                                                                                                                                        | D260–D264 |
|          | <b>Defensins knowledgebase: a manually curated database and information source focused on the defensins family of antimicrobial peptides</b> | S.Seebah, A.Suresh, S.Zhuo, Y.H.Choong, H.Chua, D.Chuon, R.Beuerman and C.Verma                                                                                                                                                                                                                                                                                                                                                                                                                                             | D265–D268 |
|          | <b>REBASE—enzymes and genes for DNA restriction and modification</b>                                                                         | R.J.Roberts, T.Vincze, J.Posfai and D.Macelis                                                                                                                                                                                                                                                                                                                                                                                                                                                                               | D269–D270 |
|          | <b>Sentra: a database of signal transduction proteins for comparative genome analysis</b>                                                    | M.D.Souza, E.M.Glass, M.H.Syed, Y.Zhang, A.Rodriguez, N.Maltsev and M.Y.Galperin                                                                                                                                                                                                                                                                                                                                                                                                                                            | D271–D273 |
|          | <b>TransportDB: a comprehensive database resource for cytoplasmic membrane transport systems and outer membrane channels</b>                 | Q.Ren, K.Chen and I.T.Paulsen                                                                                                                                                                                                                                                                                                                                                                                                                                                                                               | D274–D279 |

|          |                                                                                                                                                                                       |                                                                                                                                                                                                                                                                                                                         |           |
|----------|---------------------------------------------------------------------------------------------------------------------------------------------------------------------------------------|-------------------------------------------------------------------------------------------------------------------------------------------------------------------------------------------------------------------------------------------------------------------------------------------------------------------------|-----------|
|          | <b>Sharing of worldwide distributed carbohydrate-related digital resources: online connection of the <i>Bacterial Carbohydrate Structure DataBase</i> and <i>GLYCOSCIENCES.de</i></b> | P.Toukach, H.J.Joshi, R.Ranzinger, Y.Knirel and C.-W.von der Lieth                                                                                                                                                                                                                                                      | D280–D286 |
|          | <b>GlycoMapsDB: a database of the accessible conformational space of glycosidic linkages</b>                                                                                          | M.Frank, T.Lütteke and C.-W.von der Lieth                                                                                                                                                                                                                                                                               | D287–D290 |
|          | <b>The CATH domain structure database: new protocols and classification levels give a more comprehensive resource for exploring evolution</b>                                         | L.H.Greene, T.E.Lewis, S.Addou, A.Cuff, T.Dallman, M.Dibley, O.Redfern, F.Pearl, R.Nambudiry, A.Reid, I.Sillitoe, C.Yeats, J.M.Thornton and C.A.Orengo                                                                                                                                                                  | D291–D297 |
|          | <b>MMDB: annotating protein sequences with Entrez's 3D-structure database</b>                                                                                                         | Y.Wang, K.J.Address, J.Chen, L.Y.Geer, J.He, S.He, S.Lu, T.Madej, A.M.-Bauer, P.A.Thiessen, N.Zhang and S.H.Bryant                                                                                                                                                                                                      | D298–D300 |
|          | <b>The worldwide Protein Data Bank (wwPDB): ensuring a single, uniform archive of PDB data</b>                                                                                        | H.Berman, Ki.Henrick, H.Nakamura and J.L.Markley                                                                                                                                                                                                                                                                        | D301–D303 |
|          | <b>Protein Folding Database (PFD 2.0): an online environment for the International Foldomics Consortium</b>                                                                           | K.F.Fulton, M.A.Bate, N.G.Faux, K.Mahmood, C.Betts and A.M.Buckle                                                                                                                                                                                                                                                       | D304–D307 |
| <b>s</b> | <b>The SUPERFAMILY database in 2007: families and functions</b>                                                                                                                       | D.Wilson, M.Madera, C.Vogel, C.Chothia and J.Gough                                                                                                                                                                                                                                                                      | D308–D313 |
|          | <b>TMBETA-GENOME: database for annotated <math>\beta</math>-barrel membrane proteins in genomic sequences</b>                                                                         | M.M.Gromiha, Y.Yabuki, S.Kundu, S.Suharnan and M.Suwa                                                                                                                                                                                                                                                                   | D314–D316 |
|          | <b>TOPOFIT-DB, a database of protein structural alignments based on the TOPOFIT method</b>                                                                                            | C.M.Leslin, A.Abyzov and V.A.Ilyin                                                                                                                                                                                                                                                                                      | D317–D321 |
| <b>s</b> | <b>GO PaD: the Gene Ontology Partition Database</b>                                                                                                                                   | G.Alterovitz, M.Xiang, M.Mohan and M.F.Ramoni                                                                                                                                                                                                                                                                           | D322–D327 |
|          | <b>GeneTrees: a phylogenomics resource for prokaryotes</b>                                                                                                                            | Y.Tian and A.W.Dickerman                                                                                                                                                                                                                                                                                                | D328–D331 |
|          | <b>Eukaryotic genome size databases</b>                                                                                                                                               | T.R.Gregory, J.A.Nicol, H.Tamm, B.Kullman, K.Kullman, I.J.Leitch, B.G.Murray, D.F.Kapraun, J.Greilhuber and M.D.Bennett                                                                                                                                                                                                 | D332–D338 |
|          | <b>Genome Information Broker for Viruses (GIB-V): database for comparative analysis of virus genomes</b>                                                                              | M.Hirahata, T.Abe, N.Tanaka, Y.Kuwana, Y.Shigemoto, S.Miyazaki, Y.Suzuki and H.Sugawara                                                                                                                                                                                                                                 | D339–D342 |
|          | <b>MBGD: a platform for microbial comparative genomics based on the automated construction of orthologous groups</b>                                                                  | I.Uchiyama                                                                                                                                                                                                                                                                                                              | D343–D346 |
|          | <b>The National Microbial Pathogen Database Resource (NMPDR): a genomics platform based on subsystem annotation</b>                                                                   | L.K.McNeil, C.Reich, R.K.Aziz, D.Bartels, M.Cphoon, T.Disz, R.A.Edwards, S.Gerdes, K.Hwang, M.Kubal, G.R.Margaryan, F.Meyer, W.Mihalo, G.J.Olsen, R.Olson, A.Osterman, D.Paarmann, T.Paczian, B.Parrello, G.D.Pusch, D.A.Rodionov, X.Shi, O.Vassieva, V.Vonstein, O.Zagnitko, F.Xia, J.Zinner, R.Overbeek and R.Stevens | D347–D353 |
|          | <b>PEDANT genome database: 10 years online</b>                                                                                                                                        | M.L.Riley, T.Schmidt, I.I.Artamonova, C.Wagner, A.Volz, K.Heumann, H.-W.Mewes and D.Frushman                                                                                                                                                                                                                            | D354–D357 |
|          | <b>STRING 7—recent developments in the integration and prediction of protein interactions</b>                                                                                         | C.von Mering, L.J.Jensen, M.Kuhn, S.Chaffron, T.Doerks, B.Krüger, B.Snel and P.Bork                                                                                                                                                                                                                                     | D358–D362 |
|          | <b>euHCVdb: the European hepatitis C virus database</b>                                                                                                                               | C.Combet, N.Garnier, C.Charavay, D.Grando, D.Crisan, J.Lopez, A.Dejne-Garcia, C.Geourjon, E.Bettler, C.Hulo, P.L.Mercier, R.Bartenschlager, H.Diepolder, D.Moradpour, J.-M.Pawlotsky, C.M.Rice, C.Trépo, F.Penin and G.Deléage                                                                                          | D363–D366 |
| <b>s</b> | <b>HepSEQ: International Public Health Repository for Hepatitis B</b>                                                                                                                 | S.Gnaneshan, S.Ijaz, J.Moran, M.Ramsay and J.Green                                                                                                                                                                                                                                                                      | D367–D370 |

*Continued*

|          |                                                                                                                                                    |                                                                                                                                                                                                                                                                                                                                                                                                                                                                                          |           |
|----------|----------------------------------------------------------------------------------------------------------------------------------------------------|------------------------------------------------------------------------------------------------------------------------------------------------------------------------------------------------------------------------------------------------------------------------------------------------------------------------------------------------------------------------------------------------------------------------------------------------------------------------------------------|-----------|
|          | <b>The HIV positive selection mutation database</b>                                                                                                | C.Pan, J.Kim, L.Chen, Q.Wang and C.Lee                                                                                                                                                                                                                                                                                                                                                                                                                                                   | D371–D375 |
| <b>S</b> | <b>Influenza Virus Database (IVDB): an integrated information resource and analysis platform for influenza virus research</b>                      | S.Chang, J.Zhang, X.Liao, X.Zhu, D.Wang, J.Zhu, T.Feng, B.Zhu, G.F.Gao, J.Wang, H.Yang, J.Yu and J.Wang                                                                                                                                                                                                                                                                                                                                                                                  | D376–D380 |
| <b>S</b> | <b>ViTa: prediction of host microRNAs targets on viruses</b>                                                                                       | P.W.-C.Hsu, L.-Z.Lin, S.-D.Hsu, J.B.-K.Hsu and H.-D.Huang                                                                                                                                                                                                                                                                                                                                                                                                                                | D381–D385 |
| <b>S</b> | <b>MiST: a microbial signal transduction database</b>                                                                                              | L.E.Ulrich and I.B.Zhulin                                                                                                                                                                                                                                                                                                                                                                                                                                                                | D386–D390 |
|          | <b>MvirDB—a microbial database of protein toxins, virulence factors and antibiotic resistance genes for bio-defence applications</b>               | C.E.Zhou, J.Smith, M.Lam, A.Zemla, M.D.Dyer and T.Slezak                                                                                                                                                                                                                                                                                                                                                                                                                                 | D391–D394 |
|          | <b>Towards pathogenomics: a web-based resource for pathogenicity islands</b>                                                                       | S.H.Yoon, Y.-K.Park, S.Lee, D.Choi, T.K.Oh, C.-G.Hur and J.F.Kim                                                                                                                                                                                                                                                                                                                                                                                                                         | D395–D400 |
|          | <b>PATRIC: The VBI PathoSystems Resource Integration Center</b>                                                                                    | E.E.Snyder, N.Kampanya, J.Lu, E.K.Nordberg, H.R.Karur, M.Shukla, J.Soneja, Y.Tian, T.Xue, H.Yoo, F.Zhang, C.Dharmanolla, N.V.Dongre, J.J.Gillespie, J.Hameliuss, M.Hance, K.I.Huntington, D.Jukneliene, J.Koziski, L.Mackasmiel, S.P.Mane, V.Nguyen, A.Purkayastha, J.Shallom, G.Yu, Y.Guo, J.Gabbard, D.Hix, A.F.Azad, S.C.Baker, S.M.Boyle, Y.Khudyakov, X.J.Meng, C.Rupprecht, J.Vinje, O.R.Crasta, M.J.Czar, A.Dickerman, J.D.Eckart, R.Kenyon, R.Will, J.C.Setubal and B.W.S.Sobral | D401–D406 |
| <b>S</b> | <b>RegTransBase—a database of regulatory sequences and interactions in a wide range of prokaryotic genomes</b>                                     | A.E.Kazakov, M.J.Cipriano, P.S.Novichkov, S.Minovitsky, D.V.Vinogradov, A.Arkin, A.A.Mironov, M.S.Gelfand and I.Dubchak                                                                                                                                                                                                                                                                                                                                                                  | D407–D412 |
|          | <b>The <i>Sulfolobus</i> database</b>                                                                                                              | K.Brügger                                                                                                                                                                                                                                                                                                                                                                                                                                                                                | D413–D415 |
|          | <b>VNTRDB: a bacterial variable number tandem repeat locus database</b>                                                                            | C.-H.Chang, Y.-C.Chang, A.Underwood, C.-S.Chiou and C.-Y.Kao                                                                                                                                                                                                                                                                                                                                                                                                                             | D416–D421 |
|          | <b>Xanthusbase: adapting wikipedia principles to a model organism database</b>                                                                     | B.I.Arshinoff, G.Suen, E.M.Just, S.M.Merchant, W.A.Kibbe, R.L.Chisholm and R.D.Welch                                                                                                                                                                                                                                                                                                                                                                                                     | D422–D426 |
| <b>S</b> | <b>ApiDB: integrated resources for the apicomplexan bioinformatics resource center</b>                                                             | C.Aurrecochea, M.Heiges, H.Wang, Z.Wang, S.Fischer, P.Rhodes, J.Miller, E.Kraemer, C.J.S.Jr, D.S.Roos and J.C.Kissinger                                                                                                                                                                                                                                                                                                                                                                  | D427–D430 |
|          | <b>Comparasite: a database for comparative study of transcriptomes of parasites defined by full-length cDNAs</b>                                   | J.Watanabe, H.Wakaguri, M.Sasaki, Y.Suzuki and S.Sugano                                                                                                                                                                                                                                                                                                                                                                                                                                  | D431–D438 |
|          | <b>ParameciumDB: a community resource that integrates the <i>Paramecium tetraurelia</i> genome sequence with genetic data</b>                      | O.Arnaiz, S.Cain, J.Cohen and L.Sperling                                                                                                                                                                                                                                                                                                                                                                                                                                                 | D439–D444 |
|          | <b>TBestDB: a taxonomically broad database of expressed sequence tags (ESTs)</b>                                                                   | E.A.O'Brien, L.Koski, Y.Zhang, L.Yang, E.Wang, M.W.Gray, G.Burger and B.F.Lang                                                                                                                                                                                                                                                                                                                                                                                                           | D445–D451 |
|          | <b>Sequence resources at the <i>Candida</i> Genome Database</b>                                                                                    | M.B.Arnaud, M.C.Costanzo, M.S.Skrzypek, P.Shah, G.Binkley, C.Lane, S.R.Miyasato and G.Sherlock                                                                                                                                                                                                                                                                                                                                                                                           | D452–D456 |
|          | <b>The GermOnline cross-species systems browser provides comprehensive information on genes and gene products relevant for sexual reproduction</b> | A.Gattiker, C.Niederhauser-Wiederkehr, J.Moore, L.Hermida and M.Primig                                                                                                                                                                                                                                                                                                                                                                                                                   | D457–D462 |
|          | <b>PROPHECY—a yeast phenome database, update 2006</b>                                                                                              | L.Fernandez-Ricaud, J.Warringer, E.Ericson, K.Glaab, P.Davidsson, F.Nilsson, G.J.L.Kemp, O.Nerman and A.Blomberg                                                                                                                                                                                                                                                                                                                                                                         | D463–D467 |

|          |                                                                                                                    |                                                                                                                                                                                                                                                                                                                                                                                                                                                 |           |
|----------|--------------------------------------------------------------------------------------------------------------------|-------------------------------------------------------------------------------------------------------------------------------------------------------------------------------------------------------------------------------------------------------------------------------------------------------------------------------------------------------------------------------------------------------------------------------------------------|-----------|
|          | <b>Expanded protein information at SGD: new pages and proteome browser</b>                                         | R.Nash, S.Weng, B.Hitz, R.Balakrishnan, K.R.Christie, M.C.Costanzo, S.S.Dwight, S.R.Engel, D.G.Fisk, J.E.Hirschman, E.L.Hong, M.S.Livstone, R.Oughtred, J.Park, M.Skrzypek, C.L.Theesfeld, G.Binkley, Q.Dong, C.Lane, S.Miyasato, A.Sethuraman, M.Schroeder, K.Dolinski, D.Botstein and J.M.Cherry                                                                                                                                              | D468–D471 |
|          | <b>WormBook: the online review of <i>Caenorhabditis elegans</i> biology</b>                                        | L.R.Girard, T.J.Fiedler, T.W.Harris, F.Carvalho, I.Antoshechkin, M.Han, P.W.Sternberg, L.D.Stein and M.Chalfie                                                                                                                                                                                                                                                                                                                                  | D472–D475 |
|          | <b>BeetleBase: the model organism database for <i>Tribolium castaneum</i></b>                                      | L.Wang, S.Wang, Y.Li, M.S.R.Paradesi and S.J.Brown                                                                                                                                                                                                                                                                                                                                                                                              | D476–D479 |
|          | <b>DroSpeGe: rapid access database for new <i>Drosophila</i> species genomes</b>                                   | D.G.Gilbert                                                                                                                                                                                                                                                                                                                                                                                                                                     | D480–D485 |
|          | <b>FlyBase: genomes by the dozen</b>                                                                               | M.A.Crosby, J.L.Goodman, V.B.Strelets, P.Zhang, W.M.Gelbart and The FlyBase Consortium                                                                                                                                                                                                                                                                                                                                                          | D486–D491 |
| <b>S</b> | <b>GenomeRNAi: a database for cell-based RNAi phenotypes</b>                                                       | T.Horn, Z.Arziman, J.Berger and M.Boutros                                                                                                                                                                                                                                                                                                                                                                                                       | D492–D497 |
|          | <b>Pristionchus.org: a genome-centric database of the nematode satellite species <i>Pristionchus pacificus</i></b> | C.Dieterich, W.Roeseler, P.Sobetzko and R.J.Sommer                                                                                                                                                                                                                                                                                                                                                                                              | D498–D502 |
|          | <b>VectorBase: a home for invertebrate vector of human pathogens</b>                                               | D.Lawson, P.Arensburger, P.Atkinson, N.J.Besansky, R.V.Bruggner, R.Butler, K.S.Campbell, G.K.Christophides, S.Christley, E.Dialynas, D.Emmert, M.Hammond, C.A.Hill, R.C.Kennedy, N.F.Lobo, R.M.MacCallum, G.Madey, K.Megy, S.Redmond, S.Russo, D.W.Severson, E.O.Stinson, P.Topalis, E.M.Zdobnov, E.Birney, W.M.Gelbart, F.C.Kafatos, C.Louis and F.H.Collins                                                                                   | D503–D505 |
| <b>S</b> | <b>WormBase: new content and better access</b>                                                                     | T.Bieri, D.Blasiar, P.Ozersky, I.Antoshechkin, C.Bastiani, P.Canaran, J.Chan, N.Chen, W.J.Chen, P.Davis, T.J.Fiedler, L.Girard, M.Han, T.W.Harris, R.Kishore, R.Lee, S.McKay, H.-M.Müller, C.Nakamura, A.Petcherski, A.Rangarajan, A.Rogers, G.Schindelman, E.M.Schwarz, W.Spooner, M.A.Tuli, K.V.Auken, D.Wang, X.Wang, G.Williams, R.Durbin, L.D.Stein, P.W.Sternberg and J.Spieth                                                            | D506–D510 |
|          | <b>BRENDA, AMENDA and FRENDA: the enzyme information system in 2007</b>                                            | J.Barthelmes, C.Ebeling, A.Chang, I.Schomburg and D.Schomburg                                                                                                                                                                                                                                                                                                                                                                                   | D511–D514 |
| <b>S</b> | <b>MACiE (Mechanism, Annotation and Classification in Enzymes): novel tools for searching catalytic mechanisms</b> | G.L.Holliday, D.E.Almonacid, G.J.Bartlett, N.M.O'Boyle, J.W.Torrance, P.Murray-Rust, J.B.O.Mitchell and J.M.Thornton                                                                                                                                                                                                                                                                                                                            | D515–D520 |
|          | <b>HMDB: the Human Metabolome Database</b>                                                                         | D.S.Wishart, D.Tzur, C.Knox, R.Eisner, A.C.Guo, N.Young, D.Cheng, K.Jewell, D.Arndt, S.Sawhney, C.Fung, L.Nikolai, M.Lewis, M.-A.Coutouly, I.Forsythe, P.Tang, S.Shrivastava, K.Jeroncic, P.Stothard, G.Amegbey, D.Block, D.D.Hau, J.Wagner, J.Miniaci, M.Clements, M.Gebremedhin, N.Guo, Y.Zhang, G.E.Duggan, G.D.MacInnis, A.M.Weljie, R.Dowlatabadi, F.Bamforth, D.Clive, R.Greiner, L.Li, T.Marrie, B.D.Sykes, H.J.Vogel and L.Querengesser | D521–D526 |
|          | <b>LMSD: LIPID MAPS structure database</b>                                                                         | M.Sud, E.Fahy, D.Cotter, A.Brown, E.A.Dennis, C.K.Glass, A.H.Merrill, Jr, R.C.Murphy, C.R.H.Raetz, D.W.Russell and S.Subramaniam                                                                                                                                                                                                                                                                                                                | D527–D532 |

|          |                                                                                                                                    |                                                                                                                                                                                                                                                                                                                                                                                                                                                                                                                                                                                                                                            |           |
|----------|------------------------------------------------------------------------------------------------------------------------------------|--------------------------------------------------------------------------------------------------------------------------------------------------------------------------------------------------------------------------------------------------------------------------------------------------------------------------------------------------------------------------------------------------------------------------------------------------------------------------------------------------------------------------------------------------------------------------------------------------------------------------------------------|-----------|
|          | <b>SYSTEMONAS—an integrated database for systems biology analysis of <i>Pseudomonas</i></b>                                        | C.Choi, R.Münch, S.Leupold, J.Klein, I.Siegel, B.Thielen, B.Benkert, M.Kucklick, M.Schobert, J.Barthelmes, C.Ebeling, I.Haddad, M.Scheer, A.Grote, K.Hiller, B.Bunk, K.Schreiber, I.Retter, D.Schomburg and D.Jahn                                                                                                                                                                                                                                                                                                                                                                                                                         | D533–D537 |
| <b>S</b> | <b>CellCircuits: a database of protein network models</b>                                                                          | H.C.Mak, M.Daly, B.Gruebel and T.Ideker                                                                                                                                                                                                                                                                                                                                                                                                                                                                                                                                                                                                    | D538–D545 |
|          | <b>CutDB: a proteolytic event database</b>                                                                                         | Y.Igarashi, A.Eroshkin, S.Gramatikova, K.Gramatikoff, Y.Zhang, J.W.Smith, A.L.Osterman and A.Godzik                                                                                                                                                                                                                                                                                                                                                                                                                                                                                                                                        | D546–D549 |
| <b>S</b> | <b>CYCLONET—an integrated database on cell cycle regulation and carcinogenesis</b>                                                 | F.Kolpakov, V.Poroikov, R.Sharipov, Y.Kondrakhin, A.Zakharov, A.Lagunin, L.Milanesi and A.Kel                                                                                                                                                                                                                                                                                                                                                                                                                                                                                                                                              | D550–D556 |
|          | <b>DOMINO: a database of domain–peptide interactions</b>                                                                           | A.Ceol, A.Chatr-aryamontri, E.Santonico, R.Sacco, L.Castagnoli and G.Cesareni                                                                                                                                                                                                                                                                                                                                                                                                                                                                                                                                                              | D557–D560 |
|          | <b>IntAct—open source resource for molecular interaction data</b>                                                                  | S.Kerrien, Y.Alam-Faruque, B.Aranda, I.Bancarz, A.Bridge, C.Derow, E.Dimmer, M.Feuermann, A.Friedrichsen, R.Huntley, C.Kohler, J.Khadake, C.Leroy, A.Liban, C.Lieftink, L.Montecchi-Palazzi, S.Orchard, J.Risse, K.Robbe, B.Roechert, D.Thornycroft, Y.Zhang, R.Apweiler and H.Hermjakob                                                                                                                                                                                                                                                                                                                                                   | D561–D565 |
|          | <b>Michigan Molecular Interactions (MiMI): putting the jigsaw puzzle together</b>                                                  | M.Jayapandian, A.Chapman, V.G.Tarcea, C.Yu, A.Elkiss, A.Ianni, B.Liu, A.Nandi, C.Santos, P.Andrews, B.Athey, D.States and H.V.Jagadish                                                                                                                                                                                                                                                                                                                                                                                                                                                                                                     | D566–D571 |
|          | <b>MINT: the Molecular INteraction database</b>                                                                                    | A.Chatr-aryamontri, A.Ceol, L.M.Palazzi, G.Nardelli, M.V.Schneider, L.Castagnoli and G.Cesareni                                                                                                                                                                                                                                                                                                                                                                                                                                                                                                                                            | D572–D574 |
|          | <b>PROTCOM: searchable database of protein complexes enhanced with domain–domain structures</b>                                    | P.J.Kundrotas and E.Alexov                                                                                                                                                                                                                                                                                                                                                                                                                                                                                                                                                                                                                 | D575–D579 |
|          | <b>SNAPPI-DB: a database and API of Structures, iNterfaces and Alignments for Protein–Protein Interactions</b>                     | E.R.Jefferson, T.P.Walsh, T.J.Roberts and G.J.Barton                                                                                                                                                                                                                                                                                                                                                                                                                                                                                                                                                                                       | D580–D589 |
| <b>S</b> | <b>UniHI: an entry gate to the human protein interactome</b>                                                                       | G.Chaurasia, Y.Iqbal, C.Hänig, H.Herzel, E.E.Wanker and M.E.Futschik                                                                                                                                                                                                                                                                                                                                                                                                                                                                                                                                                                       | D590–D594 |
|          | <b>Hedgehog Signaling Pathway Database: a repository of current annotation efforts and resources for the Hh research community</b> | K.Hervold, A.Martin, R.A.Kirkpatrick, P.F.Mc Kenna and F.A.Ramirez-Weber                                                                                                                                                                                                                                                                                                                                                                                                                                                                                                                                                                   | D595–D598 |
|          | <b>AgBase: a unified resource for functional analysis in agriculture</b>                                                           | F.M.McCarthy, S.M.Bridges, N.Wang, G.B.Magee, W.P.Williams, D.S.Luthe and S.C.Burgess                                                                                                                                                                                                                                                                                                                                                                                                                                                                                                                                                      | D599–D603 |
|          | <b>AnimalQTLdb: a livestock QTL database tool set for positional QTL information mining and beyond</b>                             | Z.Hu, E.R.Fritz and J.M.Reecy                                                                                                                                                                                                                                                                                                                                                                                                                                                                                                                                                                                                              | D604–D609 |
|          | <b>Ensembl 2007</b>                                                                                                                | T.J.P.Hubbard, B.L.Aken, K.Beal, B.Ballester, M.Caccamo, Y.Chen, L.Clarke, G.Coates, F.Cunningham, T.Cutts, T.Down, S.C.Dyer, S.Fitzgerald, J.Fernandez-Banet, S.Graf, S.Haider, M.Hammond, J.Herrero, R.Holland, K.Howe, K.Howe, N.Johnson, A.Kahari, D.Keefe, F.Kokocinski, E.Kulesha, D.Lawson, I.Longden, C.Melsopp, K.Megy, P.Meidl, B.Overduin, A.Parker, A.Prlic, S.Rice, D.Rios, M.Schuster, I.Sealy, J.Severin, G.Slater, D.Smedley, G.Spudich, S.Trevanion, A.Vilella, J.Vogel, S.White, M.Wood, T.Cox, V.Curwen, R.Durbin, X.M.Fernandez-Suarez, P.Flicek, A.Kasprzyk, G.Proctor, S.Searle, J.Smith, A.Ureta-Vidal and E.Birney | D610–D617 |
| <b>S</b> | <b>The mouse Gene Expression Database (GXD): 2007 update</b>                                                                       | C.M.Smith, J.H.Finger, T.F.Hayamizu, I.J.McCright, J.T.Eppig, J.A.Kadin, J.E.Richardson and M.Ringwald                                                                                                                                                                                                                                                                                                                                                                                                                                                                                                                                     | D618–D623 |

# Contents (Continued)

Volume 35 Database issue, January 1, 2007

|          |                                                                                                                                              |                                                                                                                                                                                                                                                                                                      |           |
|----------|----------------------------------------------------------------------------------------------------------------------------------------------|------------------------------------------------------------------------------------------------------------------------------------------------------------------------------------------------------------------------------------------------------------------------------------------------------|-----------|
| <b>S</b> | <b>MamPol: a database of nucleotide polymorphism in the Mammalia class</b>                                                                   | R.Egea, S.Casillas, E.Fernández, M.À.Senar and A.Barbadilla                                                                                                                                                                                                                                          | D624–D629 |
|          | <b>The mouse genome database (MGD): new features facilitating a model system</b>                                                             | J.T.Eppig, J.A.Blake, C.J.Bult, J.A.Kadin, J.E.Richardson and the Mouse Genome Database Group                                                                                                                                                                                                        | D630–D637 |
| <b>S</b> | <b>Mouse Tumor Biology Database (MTB): status update and future directions</b>                                                               | D.A.Begley, D.M.Krupke, M.J.Vincent, J.P.Sundberg, C.J.Bult and J.T.Eppig                                                                                                                                                                                                                            | D638–D642 |
| <b>S</b> | <b>Mouse Phenome Database (MPD)</b>                                                                                                          | M.A.Bogue, S.C.Grubb, T.P.Maddatu and C.J.Bult                                                                                                                                                                                                                                                       | D643–D649 |
|          | <b>PEDE (Pig EST Data Explorer) has been expanded into Pig Expression Data Explorer, including 10 147 porcine full-length cDNA sequences</b> | H.Uenishi, T.Eguchi-Ogawa, H.Shinkai, N.Okumura, K.Suzuki, D.Toki, N.Hamasima and T.Awata                                                                                                                                                                                                            | D650–D653 |
|          | <b>PigGIS: Pig Genomic Informatics System</b>                                                                                                | J.Ruan, Y.Guo, H.Li, Y.Hu, J.Fei Song, X.Huang, K.Kristiansen, L.Bolund and J.Wang                                                                                                                                                                                                                   | D654–D657 |
|          | <b>The Rat Genome Database, update 2007—Easing the path from disease to data and back again</b>                                              | S.N.Twigger, M.Shimoyama, S.Bromberg, A.E.Kwitek, H.J.Jacob and the RGD Team                                                                                                                                                                                                                         | D658–D662 |
| <b>S</b> | <b>The ENCODE Project at UC Santa Cruz</b>                                                                                                   | D.J.Thomas, K.R.Rosenbloom, H.Clawson, A.S.Hinrichs, H.Trumbower, B.J.Raney, D.Karolchik, G.P.Barber, R.A.Harte, J.Hillman-Jackson, R.M.Kuhn, B.L.Rhead, K.E.Smith, A.Thakkapallayil, A.S.Zweig, The ENCODE Project Consortium, D.Haussler and W.J.Kent                                              | D663–D667 |
|          | <b>The UCSC genome browser database: update 2007</b>                                                                                         | R.M.Kuhn, D.Karolchik, A.S.Zweig, H.Trumbower, D.J.Thomas, A.Thakkapallayil, C.W.Sugnet, M.Stanke, K.E.Smith, A.Siepel, K.R.Rosenbloom, B.Rhead, B.J.Raney, A.Pohl, J.S.Pedersen, F.Hsu, A.S.Hinrichs, R.A.Harte, M.Diekhans, H.Clawson, G.Bejerano, G.P.Barber, R.Baertsch, D.Haussler and W.J.Kent | D668–D673 |
|          | <b>GeneSpeed: protein domain organization of the transcriptome</b>                                                                           | A.Kutchma, N.Quayum and J.Jensen                                                                                                                                                                                                                                                                     | D674–D679 |
|          | <b>PlasmID: a centralized repository for plasmid clone information and distribution</b>                                                      | D.Zuo, S.E.Mohr, Y.Hu, E.Taycher, A.Rolfs, J.Kramer, J.Williamson and J.LaBaer                                                                                                                                                                                                                       | D680–D684 |
| <b>S</b> | <b>D-HaploDB: a database of definitive haplotypes determined by genotyping complete hydatidiform mole samples</b>                            | K.Higasa, K.Miyatake, Y.Kukita, T.Tahira and K.Hayashi                                                                                                                                                                                                                                               | D685–D689 |
| <b>S</b> | <b>FINDbase: a relational database recording frequencies of genetic defects leading to inherited disorders worldwide</b>                     | S.van Baal, P.Kaimakis, M.Phommarinh, D.Koumbi, H.Cuppens, F.Riccardino, M.Macek, Jr, C.R.Scriver and G.P.Patrinis                                                                                                                                                                                   | D690–D695 |
|          | <b>PhenomicDB: a new cross-species genotype/phenotype resource</b>                                                                           | P.Groth, N.Pavlova, I.Kalev, S.Tonov, G.Georgiev, H.-D.Pohlentz and B.Weiss                                                                                                                                                                                                                          | D696–D699 |
| <b>S</b> | <b>PolyDoms: a whole genome database for the identification of non-synonymous coding SNPs with the potential to impact disease</b>           | A.G.Jegga, S.Gowrisankar, J.Chen and B.J.Aronow                                                                                                                                                                                                                                                      | D700–D706 |
| <b>S</b> | <b>Snap: an integrated SNP annotation platform</b>                                                                                           | S.Li, L.Ma, H.Li, S.Vang, Y.Hu, L.Bolund and J.Wang                                                                                                                                                                                                                                                  | D707–D710 |
|          | <b>SNP@Ethnos: a database of ethnically variant single-nucleotide polymorphisms</b>                                                          | J.Park, S.Hwang, Y.S.Lee, S.-C.Kim and D.Lee                                                                                                                                                                                                                                                         | D711–D715 |
|          | <b>Variation resources at UC Santa Cruz</b>                                                                                                  | D.J.Thomas, H.Trumbower, A.D.Kern, B.L.Rhead, R.M.Kuhn, D.Haussler and W.J.Kent                                                                                                                                                                                                                      | D716–D720 |
|          | <b>CancerGenes: a gene selection resource for cancer genome projects</b>                                                                     | M.E.Higgins, M.Claremont, J.E.Major, C.Sander and A.E.Lash                                                                                                                                                                                                                                           | D721–D726 |
|          | <b>OncoDB.HCC: an integrated oncogenomic database of hepatocellular carcinoma revealed aberrant cancer target genes and loci</b>             | W.-H.Su, C.-C.Chao, S.-H.Yeh, D.-S.Chen, P.-J.Chen and Y.-S.Jou                                                                                                                                                                                                                                      | D727–D731 |

*Continued*

|                                                                                                                                                                                                 |                                                                                                                                                                                                                                                    |           |
|-------------------------------------------------------------------------------------------------------------------------------------------------------------------------------------------------|----------------------------------------------------------------------------------------------------------------------------------------------------------------------------------------------------------------------------------------------------|-----------|
| <b>KBERG: KnowledgeBase for Estrogen Responsive Genes</b>                                                                                                                                       | S.Tang, Z.Zhang, S.L.Tan, M.-H.E.Tang, A.P.Kumar, S.K.Ramadoss and V.B.Bajic                                                                                                                                                                       | D732–D736 |
| <b>SynDB: a Synapse protein DataBase based on synapse ontology</b>                                                                                                                              | W.Zhang, Y.Zhang, H.Zheng, C.Zhang, W.Xiong, J.G.Olyarchuk, M.Walker, W.Xu, M.Zhao, S.Zhao, Z.Zhou and L.Wei                                                                                                                                       | D737–D741 |
| <b>T1DBase: integration and presentation of complex data for type 1 diabetes research</b>                                                                                                       | E.M.Hulbert, L.J.Smink, E.C.Adlem, J.E.Allen, D.B.Burdick, O.S.Burren, C.C.Cavnor, G.E.Dolman, D.Flamez, K.F.Friery, B.C.Healy, S.A.Killcoyne, B.Kutlu, H.Schuilenburg, N.M.Walker, J.Mychaleckyj, D.L.Eizirik, L.S.Wicker, J.A.Todd and N.Goodman | D742–D746 |
| <b>ArrayExpress—a public database of microarray experiments and gene expression profiles</b>                                                                                                    | H.Parkinson, M.Kapusheky, M.Shojatalab, N.Abeygunawardena, R.Coulson, A.Farne, E.Holloway, N.Kolesnykov, P.Lilja, M.Lukk, R.Mani, T.Rayner, A.Sharma, E.William, U.Sarkans and A.Brazma                                                            | D747–D750 |
| <b>EPConDB: a web resource for gene expression related to pancreatic development, beta-cell function and diabetes</b>                                                                           | J.M.Mazzarelli, J.Brestelli, R.K.Gorski, J.Liu, E.Manduchi, D.F.Pinney, J.Schug, P.White, K.H.Kaestner and C.J.Stoeckert, Jr                                                                                                                       | D751–D755 |
| <b>Gene Aging Nexus: a web database and data mining platform for microarray data on aging</b>                                                                                                   | F.Pan, C.Chiu, S.Pulapura, M.R.Mehan, J.Nunez-Iglesias, K.Zhang, K.Kamath, M.S.Waterman, C.E.Finch and X.J.Zhou                                                                                                                                    | D756–D759 |
| <b>NCBI GEO: mining tens of millions of expression profiles—database and tools update</b>                                                                                                       | T.Barrett, D.B.Troup, S.E.Wilhite, P.Ledoux, D.Rudnev, C.Evangelista, I.F.Kim, A.Soboleva, M.Tomashevsky and R.Edgar                                                                                                                               | D760–D765 |
| <b>The Stanford Microarray Database: implementation of new analysis tools and open source release of software</b>                                                                               | J.Demeter, C.Beauchamp, J.Gollub, T.Hernandez-Boussard, H.Jin, D.Maier, J.C.Matese, M.Nitzberg, F.Wymore, Z.K.Zachariah, P.O.Brown, G.Sherlock and C.A.Ball                                                                                        | D766–D770 |
| <b>MAPU: Max-Planck Unified database of organellar, cellular, tissue and body fluid proteomes</b>                                                                                               | Y.Zhang, Y.Zhang, J.Adachi, J.V.Olsen, R.Shi, G.de Souza, E.Pasini, L.J.Foster, B.Macek, A.Zougman, C.Kumar, J.R.Wisniewski, W.Jun and M.Mann                                                                                                      | D771–D779 |
| <b>s The Online Bioinformatics Resources Collection at the University of Pittsburgh Health Sciences Library System—a one-stop gateway to online bioinformatics databases and software tools</b> | Y.Chen, A.Chattopadhyay, P.Bergen, C.Gadd and N.Tannery                                                                                                                                                                                            | D780–D785 |
| <b>DisProt: the Database of Disordered Proteins</b>                                                                                                                                             | M.Sickmeier, J.A.Hamilton, T.LeGall, V.Vacic, M.S.Cortese, A.Tantos, B.Szabo, P.Tompa, J.Chen, V.N.Uversky, Z.Obradovic and A.K.Dunker                                                                                                             | D786–D793 |
| <b>PharmGED: Pharmacogenetic Effect Database</b>                                                                                                                                                | C.J.Zheng, L.Y.Han, B.Xie, C.Y.Liew, S.Ong, J.Cui, H.L.Zhang, Z.Q.Tang, S.H.Gan, L.Jiang and Y.Z.Chen                                                                                                                                              | D794–D799 |
| <b>probeBase—an online resource for rRNA-targeted oligonucleotide probes: new features 2007</b>                                                                                                 | A.Loy, F.Maixner, M.Wagner and M.Horn                                                                                                                                                                                                              | D800–D804 |
| <b>qPrimerDepot: a primer database for quantitative real time PCR</b>                                                                                                                           | W.Cui, D.D.Taub and K.Gardner                                                                                                                                                                                                                      | D805–D809 |
| <b>Organelle DB: an updated resource of eukaryotic protein localization and function</b>                                                                                                        | N.Wiwatwattana, C.M.Landau, G.J.Cope, G.A.Harp and A.Kumar                                                                                                                                                                                         | D810–D814 |
| <b>PeroxisomeDB: a database for the peroxisomal proteome, functional genomics and disease</b>                                                                                                   | A.Schlüter, S.Fourcade, E.Domènech-Estévez, T.Gabaldón, J.Huerta-Cepas, G.Berthommier, R.Ripp, R.J.A.Wanders, O.Poch and A.Pujol                                                                                                                   | D815–D822 |
| <b>An enhanced MITOMAP with a global mtDNA mutational phylogeny</b>                                                                                                                             | E.Ruiz-Pesini, M.T.Lott, V.Procaccio, J.C.Poole, M.C.Brandon, D.Mishmar, C.Yi, J.Kreuziger, P.Baldi and D.C.Wallace                                                                                                                                | D823–D828 |

|          |                                                                                                                                             |                                                                                                                                                 |           |
|----------|---------------------------------------------------------------------------------------------------------------------------------------------|-------------------------------------------------------------------------------------------------------------------------------------------------|-----------|
|          | <b>CSRDB: a small RNA integrated database and browser resource for cereals</b>                                                              | C.Johnson, L.Bowman, A.T.Adai, V.Vance and V.Sundaresan                                                                                         | D829–D833 |
|          | <b>MIPSPPlantsDB—plant database resource for integrative and comparative plant genome research</b>                                          | M.Spannagl, O.Noubibou, D.Haase, L.Yang, H.Gundlach, T.Hindemitt, K.Klee, G.Haberer, H.Schoof and K.F.X.Mayer                                   | D834–D840 |
|          | <b>PathoPlant<sup>®</sup>: a platform for microarray expression data to analyze co-regulated genes involved in plant defense responses</b>  | L.Bülow, M.Schindler and R.Hehl                                                                                                                 | D841–D845 |
|          | <b>The TIGR Plant Transcript Assemblies database</b>                                                                                        | K.L.Childs, J.P.Hamilton, W.Zhu, E.Ly, F.Cheung, H.Wu, P.D.Rabinowicz, C.D.Town, C.R.Buell and A.P.Chan                                         | D846–D851 |
| <b>S</b> | <b>POGs/PlantRBP: a resource for comparative genomics in plants</b>                                                                         | N.S.Walker, N.Stiffler and A.Barkan                                                                                                             | D852–D856 |
|          | <b>AthaMap web tools for the analysis and identification of co-regulated genes</b>                                                          | C.Galuschka, M.Schindler, L.Bülow and R.Hehl                                                                                                    | D857–D862 |
|          | <b>ATTED-II: a database of co-expressed genes and cis elements for identifying co-regulated gene groups in <i>Arabidopsis</i></b>           | T.Obayashi, K.Kinoshita, K.Nakai, M.Shibaoka, S.Hayashi, M.Saeki, D.Shibata, K.Saito and H.Ohta                                                 | D863–D869 |
|          | <b>BASC: an integrated bioinformatics system for <i>Brassica</i> research</b>                                                               | T.A.Erwin, E.G.Jewell, C.G.Love, G.A.C.Lim, X.Li, R.Chapman, J.Batley, J.E.Stajich, E.Mongin, E.Stupka, B.Ross, G.Spangenberg and D.Edwards     | D870–D873 |
|          | <b>GABI-Kat SimpleSearch: an <i>Arabidopsis thaliana</i> T-DNA mutant database with detailed information for confirmed insertions</b>       | Y.Li, M.G.Rosso, P.Viehoever and B.Weisshaar                                                                                                    | D874–D878 |
|          | <b>PlantQTL-GE: a database system for identifying candidate genes in rice and <i>Arabidopsis</i> by gene expression and QTL information</b> | H.Zeng, L.Luo, W.Zhang, J.Zhou, Z.Li, H.Liu, T.Zhu, X.Feng and Y.Zhong                                                                          | D879–D882 |
|          | <b>The TIGR Rice Genome Annotation Resource: improvements and new features</b>                                                              | S.Ouyang, W.Zhu, J.Hamilton, H.Lin, M.Campbell, K.Childs, F.Thibaud-Nissen, R.L.Malek, Y.Lee, L.Zheng, J.Orvis, B.Haas, J.Wortman and C.R.Buell | D883–D887 |
|          | <b>ForestTreeDB: a database dedicated to the mining of tree transcriptomes</b>                                                              | N.Pavy, J.J.Johnson, J.A.Crow, C.Paule, T.Kunau, J.MacKay and E.F.Retzl                                                                         | D888–D894 |
|          | <b>MaizeGDB's new data types, resources and activities</b>                                                                                  | C.J.Lawrence, M.L.Schaeffer, T.E.Seigfried, D.A.Campbell and L.C.Harper                                                                         | D895–D900 |
|          | <b>TomatEST database: <i>in silico</i> exploitation of EST data to explore expression patterns in tomato species</b>                        | N.D'Agostino, M.Aversano, L.Frusciante and M.L.Chiusano                                                                                         | D901–D905 |
|          | <b>SuperHapten: a comprehensive database for small immunogenic compounds</b>                                                                | S.Günther, D.Hempel, M.Dunkel, K.Rother and R.Preissner                                                                                         | D906–D910 |

*M*, contains a novel method

*S*, Supplementary Material available at NAR Online
